# Supplementary material
Source: Springer Nature journal article supplement (https://www.springermedizin.de/resource/supplementary/12991_2010_1279_MOESM4_ESM.pdf/9615640)

# Meta-analysis random-effects estimates (linear form)

Study omitted

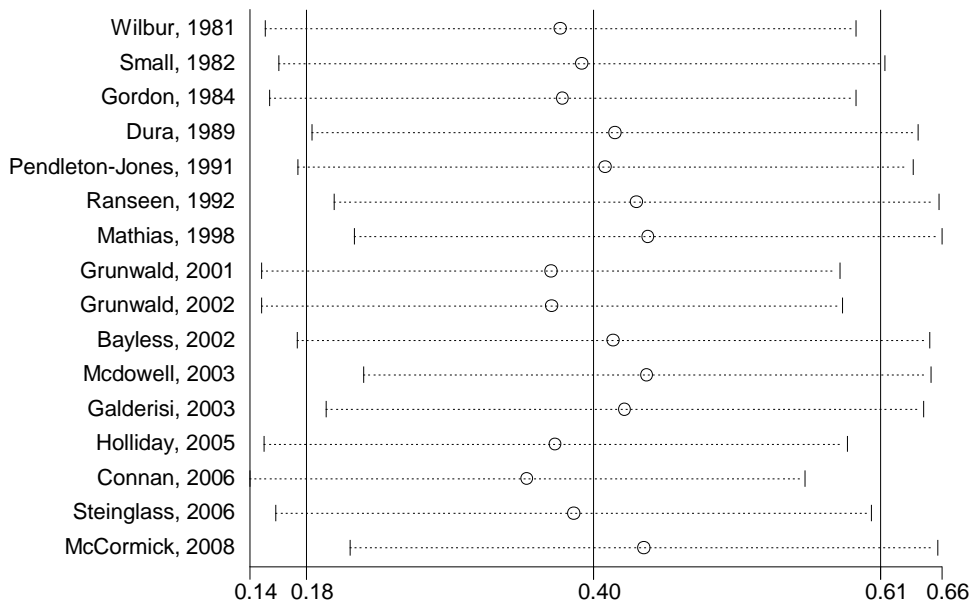

Supplement: MOESM4 [file 9615640]
